# Supplementary material for: Hiding extra-framework cations in zeolites L and Y by internal ion exchange and its effect on CO2 adsorption
Source: Royal Society of Chemistry journal article supplement (doi:10.1039/c9ta09783j), 2020-01-01

## Supporting Information

### **Hiding Extra-Framework Cations in Zeolites L and Y by Internal Ion Exchange and its Effect on CO<sub>2</sub> Adsorption**

Magdalena M. Lozinska,<sup>†</sup> David N. Miller,<sup>†</sup> Stefano Brandani<sup>‡</sup> and Paul A. Wright<sup>†</sup>

<sup>†</sup> *EaStCHEM School of Chemistry, University of St. Andrews, Purdie Building, North Haugh, St Andrews, Fife KY16 9ST, Scotland*

<sup>‡</sup> *Institute for Materials and Processes, University of Edinburgh, King's Buildings, Mayfield Rd, Edinburgh EH9 3JL, Scotland*

#### S1. Synthesis and ion exchange of Potassium Zeolite L.

Solution A was prepared by dissolving aluminium isopropoxide (1.54 g, Sigma-Aldrich) in potassium hydroxide (1.28 g, Alfa Aesar) and water (2.51 g) at 373 K, until clear. After solution A was cooled to room temperature the water loss due to evaporation was corrected. Solution B was prepared by mixing Ludox HS-40 (5.52 g, Sigma-Aldrich) with water (4.82 g) until homogeneous, which took around 3 min. Solution A was then added to solution B and the mixture was stirred until thickening of the gel started. The gel was loaded into a 40 mL PTFE (Teflon) liner inside a stainless-steel autoclave and heated at 453 K for 48 h. After crystallisation the autoclave was cooled to room temperature and the product was filtered and washed five times with distilled water (650 mL), ensuring the pH of the final wash water was 7. The product was then dried at 333 K overnight.

1.0 g of zeolite K<sub>9,0</sub>-L (K<sub>9,0</sub>Al<sub>9,0</sub>Si<sub>27,0</sub>O<sub>72</sub>) was repeatedly ion exchanged with 0.5 M lanthanum nitrate solution or 0.5 M calcium nitrate solution at 333 K for 2-4 h. Sample was then filtered and washed with deionised water, dried in a 343 K oven overnight and a cation content was measured using SEM-EDX. When the La<sup>3+</sup>(Ca<sup>2+</sup>)/Al<sup>3+</sup> ratio remained constant, the sample was calcined at 1073 K in flowing oxygen gas for 10 h. Then the process of ion exchange and calcination was repeated to reach required unit cell compositions, for example for the fully-exchanged La-L, K<sub>9,0</sub>-L was exchanged 100x and calcined 10x. Each time 0.05-0.1 g of sample

with required content of cations, before and after calcination, was kept for further analysis. The studied compositions were:  $K_{5.7}La_{1.1}Al_{9.0}Si_{27.0}O_{72}$  ( $K_{5.7}La_{1.1}$ -L),  $K_{2.7}La_{2.1}Al_{9.0}Si_{27.0}O_{72}$  ( $K_{2.7}La_{2.1}$ -L),  $La_{3.0}Al_{9.0}Si_{27.0}O_{72}$  ( $La_{3.0}$ -L),  $K_{6.2}Ca_{1.4}Al_{9.0}Si_{27.0}O_{72}$  ( $K_{6.2}Ca_{1.4}$ -L) and  $Ca_{3.8}K_{1.4}Al_{9.0}Si_{27.0}O_{72}$  ( $Ca_{3.8}K_{1.4}$ -L).

For comparison, commercially-obtained  $Na_{56.0}$ -Y ( $Na_{56.0}Al_{56.0}Si_{136.0}O_{384}$ ), was also ion exchanged 10× with 0.5 M lanthanum nitrate solution at 333 K for 6 h and heated twice at 673 K to obtain  $La_{18.7}$ -Y ( $La_{18.7}Al_{56.0}Si_{136.0}O_{384}$ ).

## S2. EDX Spectra of K-L, K,La-L and La-L samples.

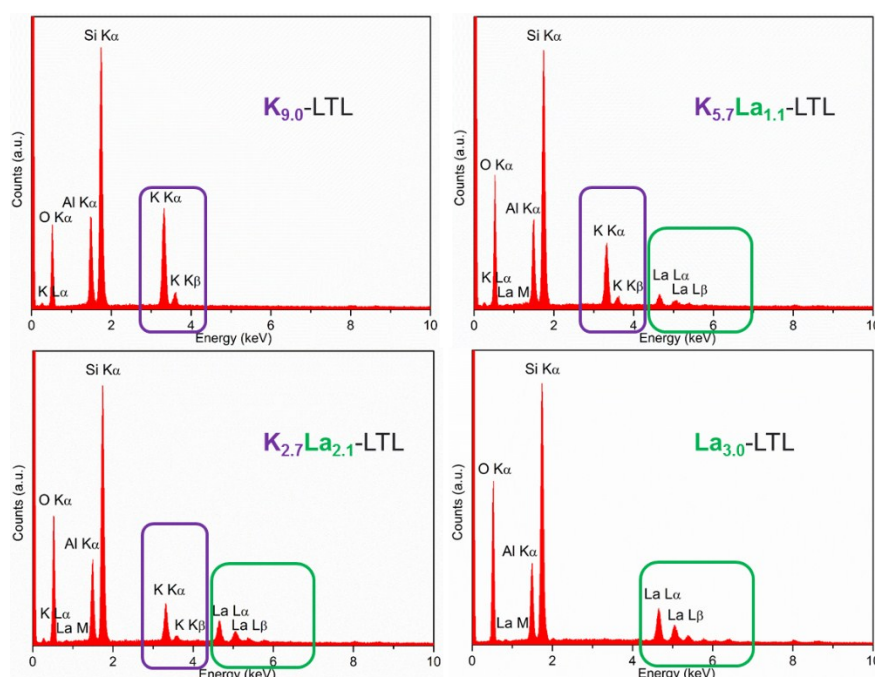

## S3. Crystallographic details of dehydrated samples.

|                       | $K_{9.0}$ -L                                | $K_{5.7}La_{1.1}$ -L<br>(before calcination) | $K_{5.7}La_{1.1}$ -L<br>(after calcination) | $K_{2.7}La_{2.1}$ -L<br>(before calcination) |
|-----------------------|---------------------------------------------|----------------------------------------------|---------------------------------------------|----------------------------------------------|
| Unit cell             | $K_{9.0}Al_{9.0}Si_{27.0}O_{72}$            | $K_{5.7}La_{1.1}Al_{9.0}Si_{27.0}O_{72}$     | $K_{5.7}La_{1.1}Al_{9.0}Si_{27.0}O_{72}$    | $K_{2.7}La_{2.1}Al_{9.0}Si_{27.0}O_{72}$     |
| Temperature/K         | 298                                         | 298                                          | 298                                         | 298                                          |
| Space group           | $P6/mmm$                                    | $P6/mmm$                                     | $P6/mmm$                                    | $P6/mmm$                                     |
| X-ray source          | Cu                                          | Cu                                           | Cu                                          | Cu                                           |
| Diffractometer        | Stoe                                        | Stoe                                         | Stoe                                        | Stoe                                         |
| Wavelength (Å)        | 1.54056                                     | 1.54056                                      | 1.54056                                     | 1.54056                                      |
| a/ Å                  | 18.43881(16)                                | 18.28369(21)                                 | 18.39583(24)                                | 18.30167(23)                                 |
| c/ Å                  | 7.48766(7)                                  | 7.50227(10)                                  | 7.42565(12)                                 | 7.43186(13)                                  |
| Volume/Å <sup>3</sup> | 2204.66(4)                                  | 2171.96(5)                                   | 2176.23(6)                                  | 2155.81(6)                                   |
| $R_p$                 | 0.0324                                      | 0.0374                                       | 0.0402                                      | 0.0388                                       |
| $R_{wp}$              | 0.0441                                      | 0.0501                                       | 0.0530                                      | 0.0519                                       |
| $\chi^2$              | 2.275                                       | 1.959                                        | 2.276                                       | 2.027                                        |
|                       | $K_{2.7}La_{2.1}$ -L<br>(after calcination) | $La_{3.0}$ -L                                | $Na_{56.0}$ -Y                              | $La_{18.7}$ -Y                               |
| Unit cell             | $K_{2.7}La_{2.1}Al_{9.0}Si_{27.0}O_{72}$    | $La_{3.0}Al_{9.0}Si_{27.0}O_{72}$            | $Na_{56.0}Al_{56.0}Si_{136.0}O_{384}$       | $La_{18.7}Al_{56.0}Si_{136.0}O_{384}$        |
| Temperature/K         | 298                                         | 298                                          | 298                                         | 298                                          |
| Space group           | $P6/mmm$                                    | $P6/mmm$                                     | $Fd\bar{3}m$                                | $Fd\bar{3}m$                                 |

|                             |              |             |              |            |
|-----------------------------|--------------|-------------|--------------|------------|
| <b>X-ray source</b>         | Cu           | Cu          | Cu           | Cu         |
| <b>Diffractometer</b>       | Stoe         | Stoe        | Stoe         | Stoe       |
| <b>Wavelength (Å)</b>       | 1.54056      | 1.54056     | 1.54056      | 1.54056    |
| <b>a/ Å</b>                 | 18.38886(29) | 18.1425(6)  | 24.78528(26) | 24.7938(4) |
| <b>c/ Å</b>                 | 7.37587(14)  | 7.36463(21) |              |            |
| <b>Volume/Å<sup>3</sup></b> | 2160.00(7)   | 2099.32(12) | 15225.9(5)   | 15241.5(8) |
| <b>R<sub>p</sub></b>        | 0.0366       | 0.0328      | 0.0285       | 0.0407     |
| <b>R<sub>wp</sub></b>       | 0.0485       | 0.0423      | 0.0395       | 0.0544     |
| <b>χ<sup>2</sup></b>        | 1.907        | 1.564       | 1.682        | 2.140      |

S4. Fractional atomic coordinates, occupancies and isotropic displacement parameters (in Å<sup>2</sup>) for dehydrated samples.

#### Zeolite L (LTL)

| <b>K<sub>9,0</sub>-L</b>                                          | <b>x</b>    | <b>y</b>    | <b>z</b>    | <b>Occup.</b> | <b>Multipl.</b> | <b>Uiso</b> |
|-------------------------------------------------------------------|-------------|-------------|-------------|---------------|-----------------|-------------|
| Si1                                                               | 0.09332(15) | 0.35680(16) | 0.5         | 0.75          | 12              | 0.0008(4)   |
| Al1                                                               | 0.09332(15) | 0.35680(16) | 0.5         | 0.25          | 12              | 0.0008(4)   |
| Si2                                                               | 0.16557(16) | 0.49789(14) | 0.21146(17) | 0.75          | 24              | 0.0008(4)   |
| Al2                                                               | 0.16557(16) | 0.49789(14) | 0.21146(17) | 0.25          | 24              | 0.0008(4)   |
| O1                                                                | 0.0         | 0.2735(4)   | 0.5         | 1.0           | 6               | 0.0008(4)   |
| O2                                                                | 0.16534(20) | 0.3307(4)   | 0.5         | 1.0           | 6               | 0.0008(4)   |
| O3                                                                | 0.26384(15) | 0.52767(29) | 0.2543(6)   | 1.0           | 12              | 0.0008(4)   |
| O4                                                                | 0.10256(22) | 0.3243(4)   | 1.0         | 1.0           | 24              | 0.0008(4)   |
| O5                                                                | 0.42487(15) | 0.84973(31) | 0.2713(6)   | 1.0           | 12              | 0.0008(4)   |
| O6                                                                | 0.14649(28) | 0.47819(28) | 0.0         | 1.0           | 12              | 0.0008(4)   |
| K1 (site I)                                                       | 0.3333      | 0.6667      | 0.5         | 1.023(5)      | 2               | 0.025       |
| K2 (site II)                                                      | 0.0         | 0.5         | 0.5         | 1.005(4)      | 3               | 0.025       |
| K3 (site III)                                                     | 0.0         | 0.31904(25) | 0.0         | 0.6410(29)    | 6               | 0.025       |
| <b>K<sub>5,7</sub>La<sub>1,1</sub>-L<br/>(before calcination)</b> | <b>x</b>    | <b>y</b>    | <b>z</b>    | <b>Occup.</b> | <b>Multipl.</b> | <b>Uiso</b> |
| Si1                                                               | 0.09313(21) | 0.35716(22) | 0.5         | 0.75          | 12              | 0.0067(5)   |
| Al1                                                               | 0.09313(21) | 0.35716(22) | 0.5         | 0.25          | 12              | 0.0067(5)   |
| Si2                                                               | 0.16412(22) | 0.49741(19) | 0.20972(26) | 0.75          | 24              | 0.0067(5)   |
| Al2                                                               | 0.16412(22) | 0.49741(19) | 0.20972(26) | 0.25          | 24              | 0.0067(5)   |
| O1                                                                | 0.0         | 0.2730(6)   | 0.5         | 1.0           | 6               | 0.0067(5)   |
| O2                                                                | 0.16697(29) | 0.3339(6)   | 0.5         | 1.0           | 6               | 0.0067(5)   |
| O3                                                                | 0.26372(21) | 0.5274(4)   | 0.2556(9)   | 1.0           | 12              | 0.0067(5)   |
| O4                                                                | 0.10009(28) | 0.41576(31) | 0.3245(5)   | 1.0           | 24              | 0.0067(5)   |
| O5                                                                | 0.42676(21) | 0.8535(4)   | 0.2696(9)   | 1.0           | 12              | 0.0067(5)   |
| O6                                                                | 0.1434(4)   | 0.4766(4)   | 0.0         | 1.0           | 12              | 0.0067(5)   |
| K1 (site I)                                                       | 0.3333      | 0.6667      | 0.5         | 1.026(7)      | 2               | 0.025       |
| K2 (site II)                                                      | 0.0         | 0.5         | 0.5         | 0.734(7)      | 3               | 0.025       |
| K3 (site III)                                                     | 0.0         | 0.321(7)    | 0.0         | 0.245(4)      | 6               | 0.05        |
| La2 (site II)                                                     | 0.0         | 0.5         | 0.5         | 0.26445       | 3               | 0.025       |
| La3 (site III)                                                    | 0.0         | 0.323(11)   | 0.0         | 0.04623       | 6               | 0.025       |
| <b>K<sub>5,7</sub>La<sub>1,1</sub>-L<br/>(after calcination)</b>  | <b>x</b>    | <b>y</b>    | <b>z</b>    | <b>Occup.</b> | <b>Multipl.</b> | <b>Uiso</b> |
| Si1                                                               | 0.09171(22) | 0.35388(25) | 0.5         | 0.75          | 12              | 0.0075(5)   |
| Al1                                                               | 0.09171(22) | 0.35388(25) | 0.5         | 0.25          | 12              | 0.0075(5)   |
| Si2                                                               | 0.16574(23) | 0.49792(20) | 0.21439(28) | 0.75          | 24              | 0.0075(5)   |
| Al2                                                               | 0.16574(23) | 0.49792(20) | 0.21439(28) | 0.25          | 24              | 0.0075(5)   |
| O1                                                                | 0.0         | 0.2710(6)   | 0.5         | 1.0           | 6               | 0.0075(5)   |
| O2                                                                | 0.16609(30) | 0.3321(6)   | 0.5         | 1.0           | 6               | 0.0075(5)   |
| O3                                                                | 0.26514(20) | 0.5301(4)   | 0.2576(9)   | 1.0           | 12              | 0.0075(5)   |

|                                                                   |             |             |             |               |                 |             |
|-------------------------------------------------------------------|-------------|-------------|-------------|---------------|-----------------|-------------|
| O4                                                                | 0.10200(34) | 0.41314(33) | 0.3274(6)   | 1.0           | 24              | 0.0075(5)   |
| O5                                                                | 0.42546(22) | 0.8509(4)   | 0.2728(9)   | 1.0           | 12              | 0.0075(5)   |
| O6                                                                | 0.1503(5)   | 0.4804(4)   | 0.0         | 1.0           | 12              | 0.0075(5)   |
| K1 (site I)                                                       | 0.3333      | 0.6667      | 0.5         | 0.676(4)      | 2               | 0.025       |
| K2 (site II)                                                      | 0.0         | 0.5         | 0.5         | 0.537(6)      | 3               | 0.025       |
| K3 (site III)                                                     | 0.0         | 0.3180(5)   | 0.0         | 0.465(4)      | 6               | 0.025       |
| La1 (site I)                                                      | 0.3333      | 0.6667      | 0.5         | 0.324(4)      | 2               | 0.025       |
| La2 (site II)                                                     | 0.0         | 0.5         | 0.5         | 0.16017       | 3               | 0.025       |
|                                                                   |             |             |             |               |                 |             |
| <b>K<sub>2,7</sub>La<sub>2,1</sub>-L<br/>(before calcination)</b> | <b>x</b>    | <b>y</b>    | <b>z</b>    | <b>Occup.</b> | <b>Multipl.</b> | <b>Uiso</b> |
| Si1                                                               | 0.09174(25) | 0.35465(27) | 0.5         | 0.75          | 12              | 0.0084(6)   |
| Al1                                                               | 0.09174(25) | 0.35465(27) | 0.5         | 0.25          | 12              | 0.0084(6)   |
| Si2                                                               | 0.16507(27) | 0.49769(22) | 0.21394(30) | 0.75          | 24              | 0.0084(6)   |
| Al2                                                               | 0.16507(27) | 0.49769(22) | 0.21394(30) | 0.25          | 24              | 0.0084(6)   |
| O1                                                                | 0.0         | 0.2711(7)   | 0.5         | 1.0           | 6               | 0.0084(6)   |
| O2                                                                | 0.16707(32) | 0.3340(6)   | 0.5         | 1.0           | 6               | 0.0084(6)   |
| O3                                                                | 0.26373(23) | 0.5274(5)   | 0.2571(10)  | 1.0           | 12              | 0.0084(6)   |
| O4                                                                | 0.1025(4)   | 0.4148(4)   | 0.3274(7)   | 1.0           | 24              | 0.0084(6)   |
| O5                                                                | 0.42594(25) | 0.8519(5)   | 0.2733(10)  | 1.0           | 12              | 0.0084(6)   |
| O6                                                                | 0.1486(5)   | 0.4809(5)   | 0.0         | 1.0           | 12              | 0.0084(6)   |
| K1 (site I)                                                       | 0.3333      | 0.6667      | 0.5         | 0.584(5)      | 2               | 0.025       |
| K3 (site III)                                                     | 0.0         | 0.3244(10)  | 0.0         | 0.253(4)      | 6               | 0.025       |
| La1 (site I)                                                      | 0.3333      | 0.6667      | 0.5         | 0.372(5)      | 2               | 0.055       |
| La2 (site II)                                                     | 0.0         | 0.5         | 0.5         | 0.4514(23)    | 3               | 0.055       |
|                                                                   |             |             |             |               |                 |             |
| <b>K<sub>2,7</sub>La<sub>2,1</sub>-L<br/>(after calcination)</b>  | <b>x</b>    | <b>y</b>    | <b>z</b>    | <b>Occup.</b> | <b>Multipl.</b> | <b>Uiso</b> |
| Si1                                                               | 0.09174(26) | 0.35219(30) | 0.5         | 0.75          | 12              | 0.0077(7)   |
| Al1                                                               | 0.09174(26) | 0.35219(30) | 0.5         | 0.25          | 12              | 0.0077(7)   |
| Si2                                                               | 0.16494(27) | 0.49770(23) | 0.21643(34) | 0.75          | 24              | 0.0077(7)   |
| Al2                                                               | 0.16494(27) | 0.49770(23) | 0.21643(34) | 0.25          | 24              | 0.0077(7)   |
| O1                                                                | 0.0         | 0.2742(7)   | 0.5         | 1.0           | 6               | 0.0077(7)   |
| O2                                                                | 0.1652(4)   | 0.3303(7)   | 0.5         | 1.0           | 6               | 0.0077(7)   |
| O3                                                                | 0.26584(23) | 0.5316(5)   | 0.2613(11)  | 1.0           | 12              | 0.0077(7)   |
| O4                                                                | 0.1045(4)   | 0.4134(4)   | 0.3293(8)   | 1.0           | 24              | 0.0077(7)   |
| O5                                                                | 0.42489(27) | 0.8497(5)   | 0.2781(12)  | 1.0           | 12              | 0.0077(7)   |
| O6                                                                | 0.1520(5)   | 0.4831(5)   | 0.0         | 1.0           | 12              | 0.0077(7)   |
| K1 (site I)                                                       | 0.3333      | 0.6667      | 0.5         | 0.365(5)      | 2               | 0.025       |
| K3 (site II)                                                      | 0.0         | 0.3186(9)   | 0.0         | 0.321(5)      | 6               | 0.034       |
| La1 (site I)                                                      | 0.3333      | 0.6667      | 0.5         | 0.635(5)      | 2               | 0.055       |
| La2 (site II)                                                     | 0.0         | 0.5         | 0.5         | 0.2686(22)    | 3               | 0.055       |
|                                                                   |             |             |             |               |                 |             |
| <b>La<sub>3,0</sub>-L</b>                                         | <b>x</b>    | <b>y</b>    | <b>z</b>    | <b>Occup.</b> | <b>Multipl.</b> | <b>Uiso</b> |
| Si1                                                               | 0.0887(4)   | 0.3512(4)   | 0.5         | 0.75          | 12              | 0.0030(8)   |
| Al1                                                               | 0.0887(4)   | 0.3512(4)   | 0.5         | 0.25          | 12              | 0.0030(8)   |
| Si2                                                               | 0.1671(4)   | 0.4989(4)   | 0.2156(5)   | 0.75          | 24              | 0.0030(8)   |
| Al2                                                               | 0.1671(4)   | 0.4989(4)   | 0.2156(5)   | 0.25          | 24              | 0.0030(8)   |
| O1                                                                | 0.0         | 0.2631(12)  | 0.5         | 1.0           | 6               | 0.0030(8)   |
| O2                                                                | 0.1637(5)   | 0.3275(10)  | 0.5         | 1.0           | 6               | 0.0030(8)   |
| O3                                                                | 0.2634(4)   | 0.5267(8)   | 0.2709(16)  | 1.0           | 12              | 0.0030(8)   |
| O4                                                                | 0.1008(5)   | 0.4095(5)   | 0.3330(10)  | 1.0           | 24              | 0.0030(8)   |
| O5                                                                | 0.4334(5)   | 0.8667(9)   | 0.2706(16)  | 1.0           | 12              | 0.0030(8)   |
| O6                                                                | 0.1500(8)   | 0.4853(8)   | 0.0         | 1.0           | 12              | 0.0030(8)   |
| La1 (site I)                                                      | 0.3333      | 0.6667      | 0.5         | 0.851(5)      | 2               | 0.025       |

|                |     |            |     |            |   |       |
|----------------|-----|------------|-----|------------|---|-------|
| La2 (site II)  | 0.0 | 0.5        | 0.5 | 0.3323(31) | 3 | 0.025 |
| La3 (site III) | 0.0 | 0.3471(26) | 0.0 | 0.0432(20) | 6 | 0.025 |

### Zeolite Y (FAU)

| Na <sub>56.0</sub> -Y | x           | y           | z           | Occup.     | Multipl. | Uiso       |
|-----------------------|-------------|-------------|-------------|------------|----------|------------|
| Si1                   | 0.12496(12) | 0.94508(11) | 0.03571(12) | 0.71       | 192      | 0.0060(4)  |
| Al1                   | 0.12496(12) | 0.94508(11) | 0.03571(12) | 0.29       | 192      | 0.0060(4)  |
| O1                    | 0.17637(20) | 0.17637(20) | 0.96588(35) | 1.0        | 96       | 0.0060(4)  |
| O2                    | 0.17846(22) | 0.17846(22) | 0.31876(28) | 1.0        | 96       | 0.0060(4)  |
| O3                    | 0.25289(22) | 0.25289(22) | 0.14493(28) | 1.0        | 96       | 0.0060(4)  |
| O4                    | 0.10637(19) | 0.89363(19) | 0.0         | 1.0        | 96       | 0.0060(4)  |
| Na2                   | 0.05539(32) | 0.05539(32) | 0.05539(32) | 0.555(11)  | 32       | 0.045      |
| Na3                   | 0.23386(20) | 0.23386(20) | 0.23386(20) | 0.950(11)  | 32       | 0.045      |
| Na4                   | 0.0         | 0.0         | 0.0         | 0.472(13)  | 16       | 0.045      |
|                       |             |             |             |            |          |            |
| La <sub>18.7</sub> -Y | x           | y           | z           | Occup.     | Multipl. | Uiso       |
| Si1                   | 0.12647(19) | 0.94602(17) | 0.03748(21) | 0.71       | 192      | 0.0277(13) |
| Al1                   | 0.12647(19) | 0.94602(17) | 0.03748(21) | 0.29       | 192      | 0.0277(13) |
| O1                    | 0.17765(31) | 0.17765(31) | 0.9724(4)   | 1.0        | 96       | 0.0277(13) |
| O2                    | 0.17886(35) | 0.17886(35) | 0.3210(5)   | 1.0        | 96       | 0.0277(13) |
| O3                    | 0.24893(30) | 0.24893(30) | 0.1393(4)   | 1.0        | 96       | 0.0277(13) |
| O4                    | 0.11011(34) | 0.88990(34) | 0.0         | 1.0        | 96       | 0.0277(13) |
| La2                   | 0.06831(10) | 0.06831(10) | 0.06831(10) | 0.6044(27) | 32       | 0.005      |

S5. XRD patterns of K,L a-L samples heated at different temperatures.

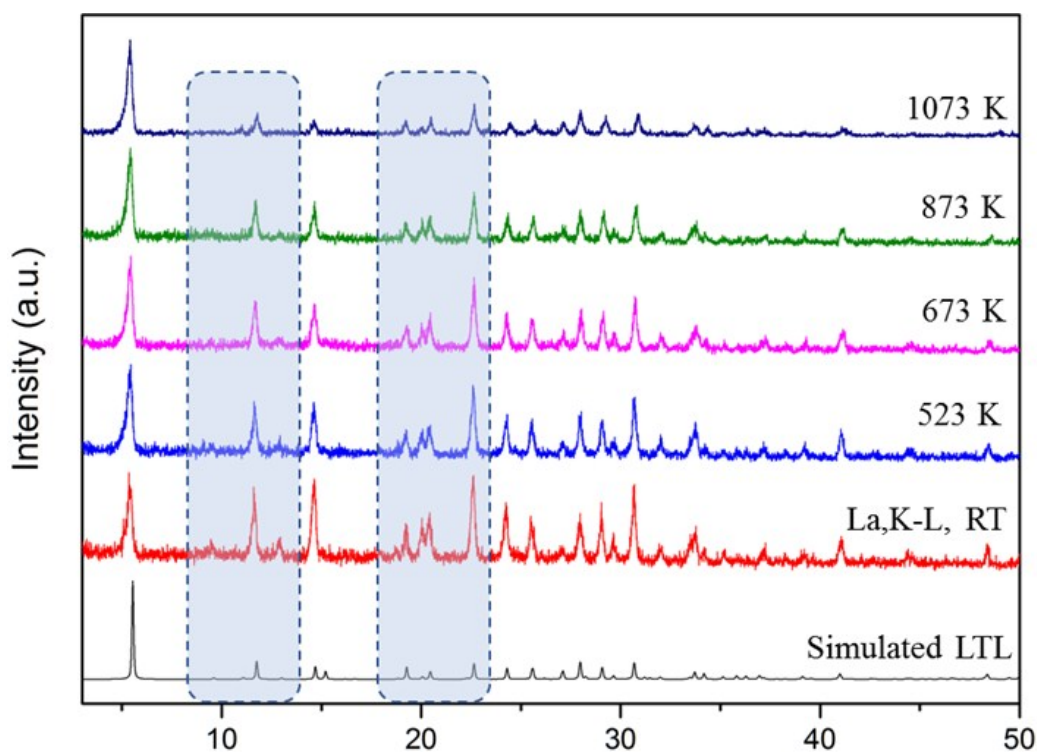

S6. TGA graphs of K-, K,La- and La-L samples.

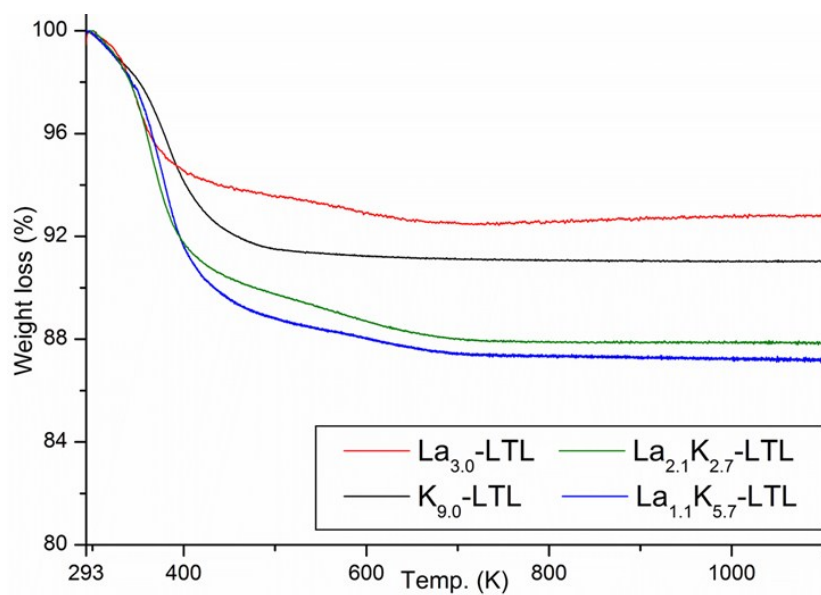

S7. Colour change from white (K-L) to light pink for La<sub>3.0</sub>-L.

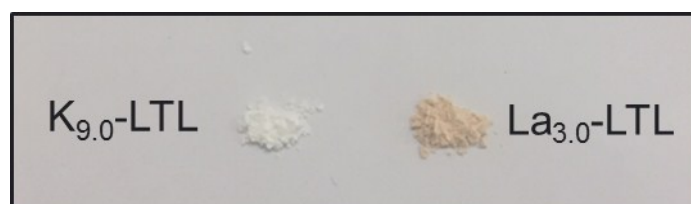

S8. Plots to derive Henry law constants at 298 K for (a)  $K_{9.0-L}$ , (b)  $K_{5.7La_{1.1}-L}$ , (c)  $K_{2.7La_{2.1}-L}$ , (d)  $La_{3.0-L}$ , (e)  $Na_{56.0-Y}$  and (f)  $La_{18.7-Y}$ .

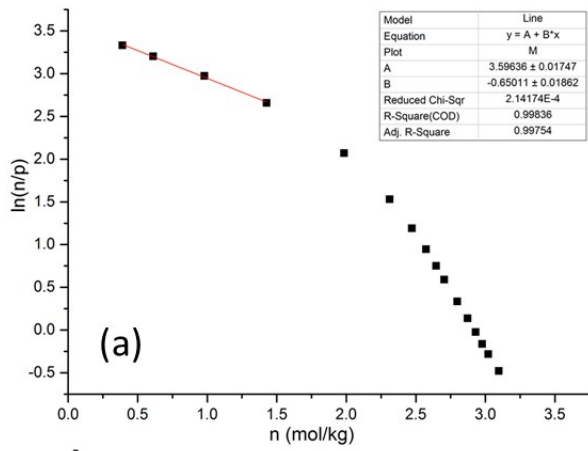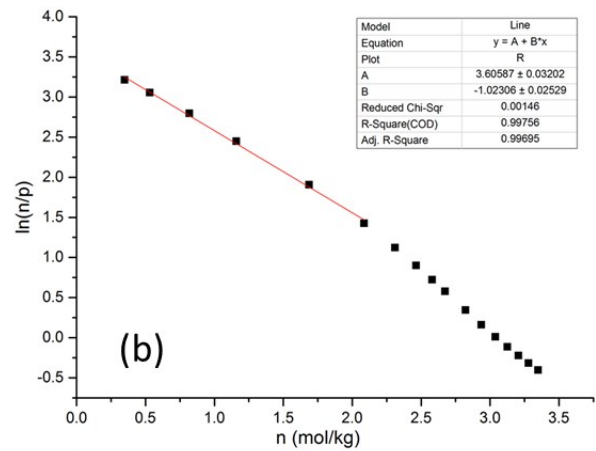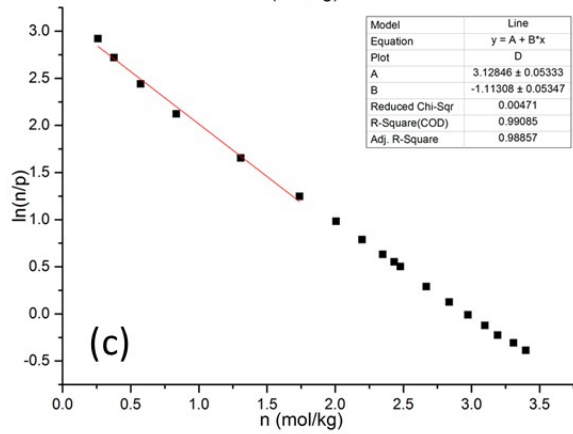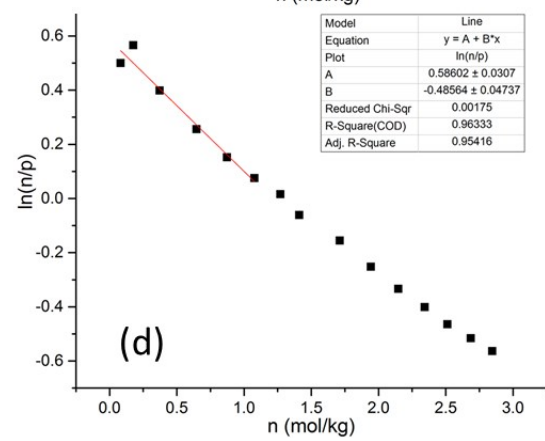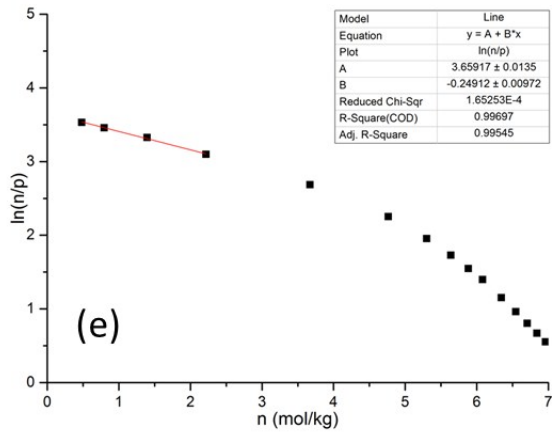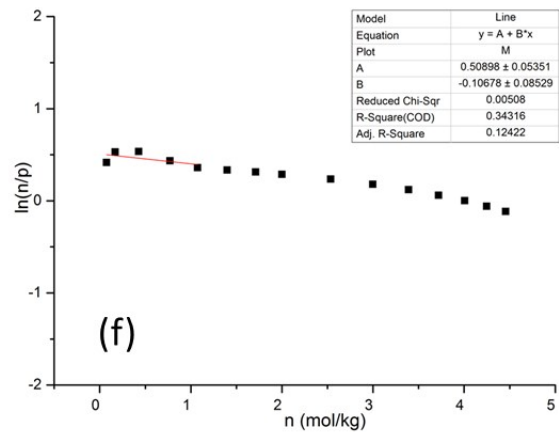

S9. Fitted CO<sub>2</sub> adsorption isotherms for K-L (a,c and e) and La-L (b,d and f) at different temperatures: (a) and (b) 278 K, (c) and (d) 288 K, and (e) and (f) 298 K. The isotherms were fitted by virial equations using Desmos software. Clausius-Clapeyron equations for K-L (g) and La-L (h) at uptakes 0.75 (■), 1.0 (●), 1.25 (▲) and 1.5 mmol g<sup>-1</sup> (▼) used for the calculation of the isosteric heats of adsorption.

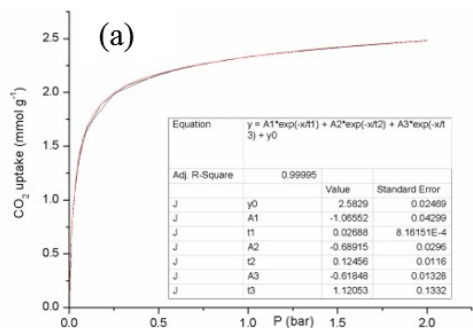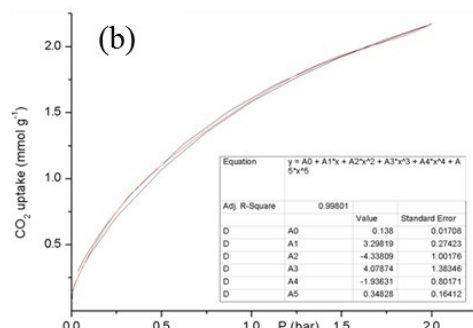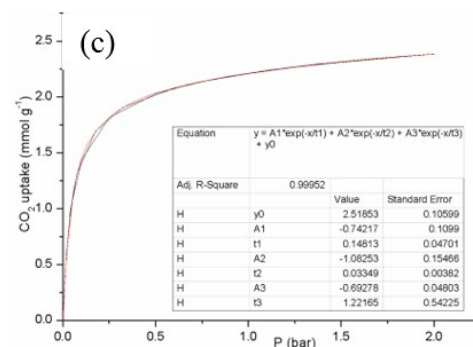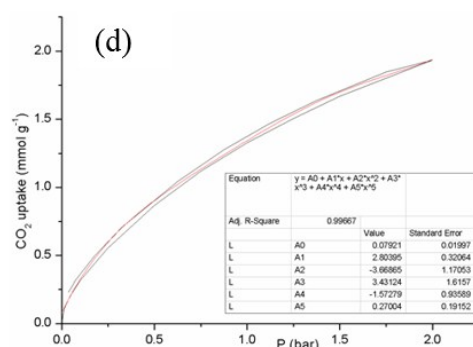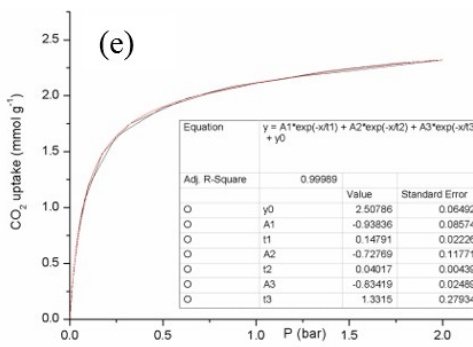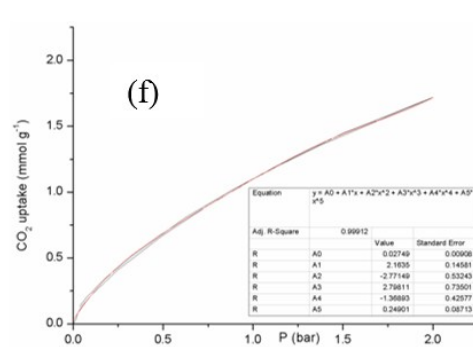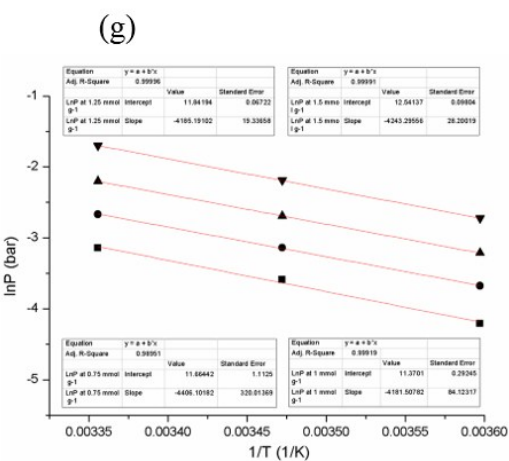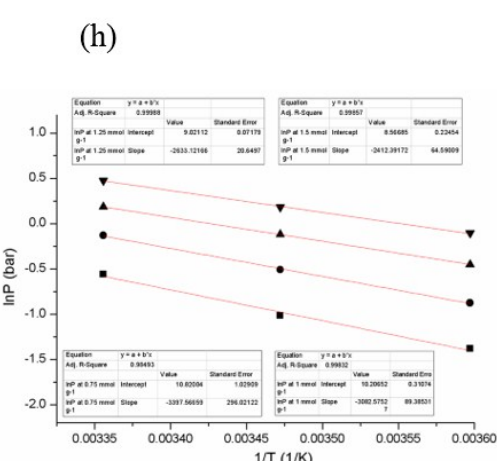



S10. XRD pattern of  $\text{Ca}_{4.0}\text{K}_{1.2}\text{-L}$  sample.

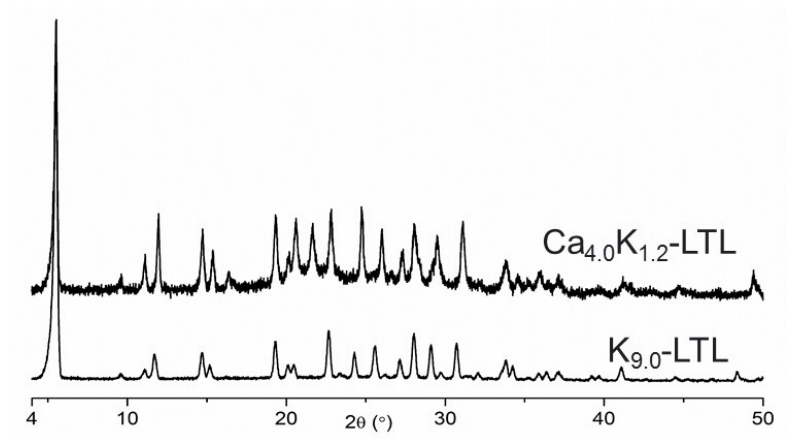

S11. Unit cell parameters vs. number of exchanging cations in (a) K,La-L and (b) K,Ca-L samples.

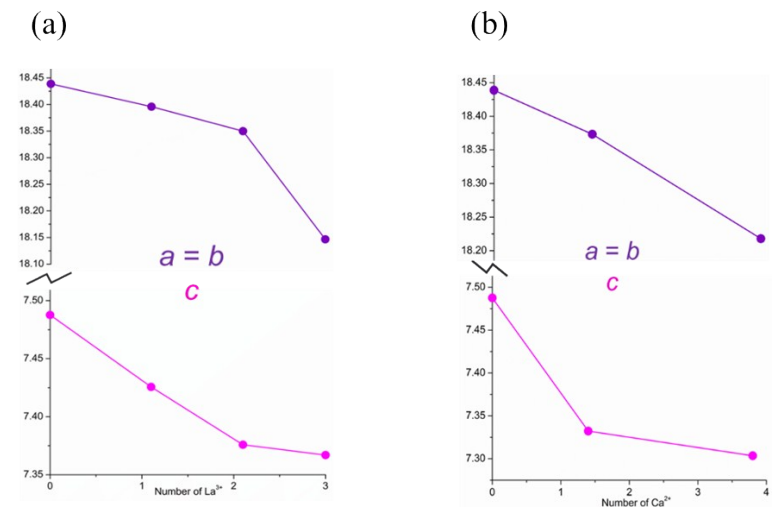

S12.  $\text{CO}_2$  isotherms at 298 K on Ca,K-L samples.

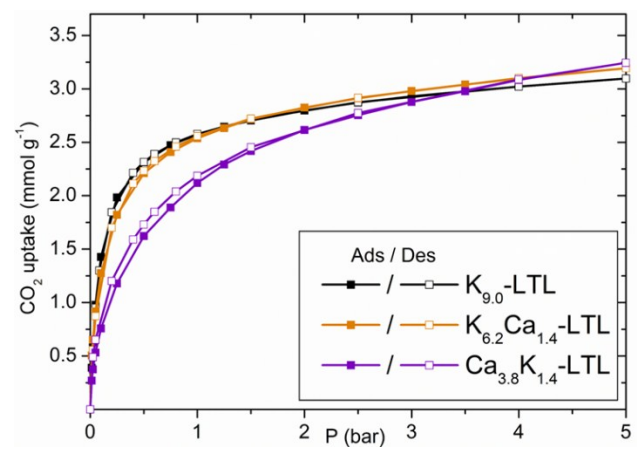

S13. Rietveld plots of PXRD profiles ( $\lambda = 1.54056 \text{ \AA}$ ,  $T = 298 \text{ K}$ ) of dehydrated (a)  $\text{Na}_{56.0}\text{-Y}$  and (b)  $\text{La}_{18.7}\text{-Y}$  (Observed – black, calculated – red, difference – blue, phase – pink and background – green).

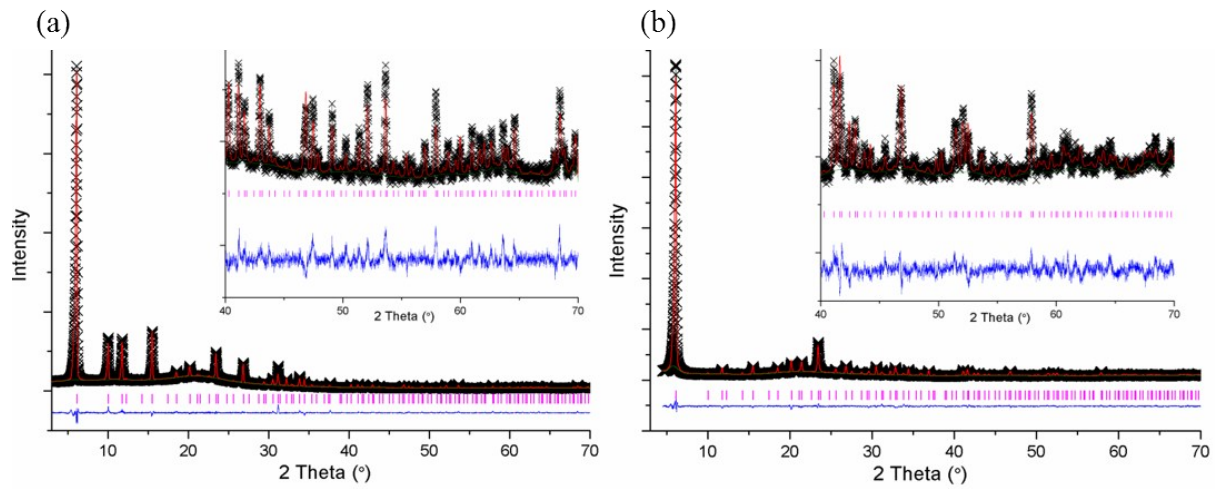

Supplement: c9ta09783j1.pdf [file c9ta09783j1.pdf]
